# Supplementary material for: Synthesis of Ni-Co Hydroxide Nanosheets Constructed Hollow Cubes for Electrochemical Glucose Determination
Source: MDPI journal article supplement (doi:10.3390/s19132938), 2019-07-03
Supplement: s1 [file s1]

## Supplementary Information

# Synthesis of Ni-Co Hydroxide Nanosheets Constructed Hollow Cubes for Electrochemical Glucose Determination

Fengchao Sun <sup>1,2</sup>, Shutao Wang <sup>3</sup>, Yuqi Wang <sup>3</sup>, Jingtong Zhang <sup>2</sup>, Xinping Yu <sup>2</sup>, Yan Zhou <sup>\*,1,2,3</sup> and Jun Zhang <sup>1,2</sup>

<sup>1</sup> School of Materials Science and Engineering, China University of Petroleum (East China), Qingdao 266580, China

<sup>2</sup> School of Chemical Engineering, China University of Petroleum (East China), Qingdao 266580, China

<sup>3</sup> College of Science, China University of Petroleum (East China), Qingdao 266580, China

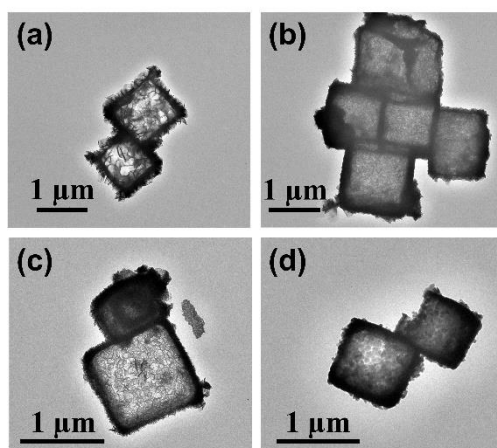

**Figure S1.** The TEM images of (a)  $\text{Co(OH)}_2$ , (b)  $\text{Ni}_{0.3}\text{Co}_{0.7}(\text{OH})_2$ , (c)  $\text{Ni}_{0.5}\text{Co}_{0.5}(\text{OH})_2$  and (d)  $\text{Ni(OH)}_2$  hollow cubes.

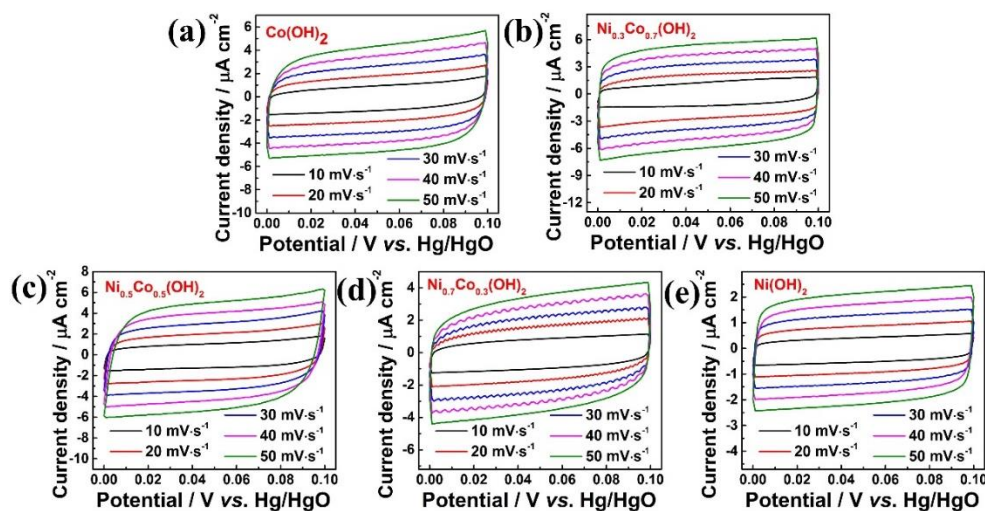

**Figure S2.** Cyclic voltammograms plots of different  $\text{Ni}_x\text{Co}_{1-x}(\text{OH})_2/\text{CP}$  at various scan rates (10–50  $\text{mV s}^{-1}$ ).
